# Supplementary material
Source: PubMed Central journal article supplement (PMC5788702)
Supplement: NIHMS912451-supplement-Supp_FigS1.pdf [file NIHMS912451-supplement-Supp_FigS1.pdf]

**A SS03: Revertant 1**

C A R C S I G T A P L D A I D I  
TGTGCGAGATGTTCTATAGGAAACAGCTCCCTCTTGATGCTATTGATATCTGGGGCCAAGGGACAATGGTCACCGTCTCCTCAG  
TGTGCGAGATGTTCTATAGCAGCAGCTGGTCTTGATGCTTTTGATATCTGGGGCCAAGGGACAATGGTCACCGTCTCCTCAG  
C A R C S I A A A G L D A F D I

**VH4-59**                      **D6-13**                      **JH3**

---

**SS03: Revertant 2**

C A R C S I G T A P L D A I D I  
TGTGCGAGATGTTCTATAGGAAACAGCTCCCTCTTGATGCTATTGATATCTGGGGCCAAGGGACAATGGTCACCGTCTCCTCAG  
TGTGCGAGAGGTTCTATAGCAGCAGCTGGTCTTGATGCTTTTGATATCTGGGGCCAAGGGACAATGGTCACCGTCTCCTCAG  
C A R G S I A A A G L D A F D I

**VH4-59**                      **D6-13**                      **JH3**

---

**B SS204: Revertant 1**

C A R E G Y G D G N R P F D Y  
TGTGCGAGAGAAGGCTACGGTGATGGTAACCGCCCTTTGACTACTGGGGCCAAGGAACCTGGTCACCGTCTCCTCAG  
TGTGCGAGAGAAGACTACGGTGATGGTAACCGCCACTTTGACTACTGGGGCCAAGGAACCTGGTCACCGTCTCCTCAG  
C A R E D Y G D G N R H F D Y

**VH1-69**                      **D4-17**                      **JH4**

---

**SS204: Revertant 2**

C A R E G Y G D G N R P F D Y  
TGTGCGAGAGAAGGCTACGGTGATGGTAACCGCCCTTTGACTACTGGGGCCAAGGAACCTGGTCACCGTCTCCTCAG  
TGTGCGAGAGAAGGCTACTACGGTGATGGTAACCGCCACTTTGACTACTGGGGCCAAGGAACCTGGTCACCGTCTCCTCAG  
C A R E G Y Y G G N R H F D Y

**VH1-69**                      **D4-23**                      **JH4**

---

**SS204: Revertant 3**

C A R E G Y G D G N R P F D Y  
TGTGCGAGAGAAGGCTACGGTGATGGTAACCGCCCTTTGACTACTGGGGCCAAGGAACCTGGTCACCGTCTCCTCAG  
TGTGCGAGAGAAGGCTACTACGGTGATGGTAACCGCTACTTTGACTACTGGGGCCAAGGAACCTGGTCACCGTCTCCTCAG  
C A R E G Y Y G G N R Y F D Y

**VH1-69**                      **D4-23**                      **JH4**

---

**C SS59: Revertant**

C A R V R D F W S D Y Y R N P P R S F K Y G M D V  
TGTGCGAGAGTTCGCGATTTTGGAGTGAATTATTATAGAAAACCCGCCCGGTCTTTAAATACGGTATGGACGTCCTGGGGCCAAGGGACCACGGTCACCGTCTCCTCA  
TGTGCGAGAGTTCGCGATTTTGGAGTGGTTATTATAGAAAACCCGCCCGGTACTACTACTACGGTATGGACGTCCTGGGGCCAAGGGACCACGGTCACCGTCTCCTCA  
C A R V R D F W S G Y Y R N P P R Y Y Y Y G M D V

**VH3-53**                      **D3-3**                      **JH6**

**Figure S1. IgH CDR3 sequences of unmutated revertant antibodies engineered from SS antibodies.** For each SS monoclonal expansion we reverted in vitro mutated antibody heavy- and light-chain genes to their original unmutated sequences.
