# Supplementary material
Source: PubMed Central journal article supplement (PMC5788702)
Supplement: NIHMS912451-supplement-Supp_TableS1-7.pdf [file NIHMS912451-supplement-Supp_TableS1-7.pdf]

**Supplemental Table 1.** Repertoire of antibodies from CD21-/lo B cells of Sjögren's syndrome patient SS03

| Ig            | HEAVY |   |    |    |               |        |      | LIGHT |    |           |        |      |
|---------------|-------|---|----|----|---------------|--------|------|-------|----|-----------|--------|------|
|               | VH    | D | RF | JH | CDR3 (aa)     | Length | Mut. | Vk    | Jk | CDR3 (aa) | Length | Mut. |
| CD21- SS03 03 | 4-59  | / | /  | 3  | CSIGTAPLDAIDI | 13     | 20   | 4-1   | 2  | QQYYSTPYS | 9      | 4    |
| CD21- SS03 05 | 4-59  | / | /  | 3  | CSIGTAPLDAIDI | 13     | 20   | 4-1   | 2  | QQYYSTPYS | 9      | 4    |
| CD21- SS03 07 | 4-59  | / | /  | 3  | CSIGTAPLDAIDI | 13     | 20   | 4-1   | 2  | QQYYSTPYS | 9      | 4    |
| CD21- SS03 08 | 4-59  | / | /  | 3  | CSIGTAPLDAIDI | 13     | 20   | 4-1   | 2  | QQYYSTPYS | 9      | 4    |
| CD21- SS03 11 | 4-59  | / | /  | 3  | CSIGTAPLDAIDI | 13     | 20   | 4-1   | 2  | QQYYSTPYS | 9      | 4    |
| CD21- SS03 13 | 4-59  | / | /  | 3  | CSIGTAPLDAIDI | 13     | 20   | 4-1   | 2  | QQYYSTPYS | 9      | 4    |
| CD21- SS03 14 | 4-59  | / | /  | 3  | CSIGTAPLDAIDI | 13     | 20   | 4-1   | 2  | QQYYSTPYS | 9      | 4    |
| CD21- SS03 15 | 4-59  | / | /  | 3  | CSIGTAPLDAIDI | 13     | 20   | 4-1   | 2  | QQYYSTPYS | 9      | 4    |
| CD21- SS03 16 | 4-59  | / | /  | 3  | CSIGTAPLDAIDI | 13     | 20   | 4-1   | 2  | QQYYSTPYS | 9      | 4    |
| CD21- SS03 18 | 4-59  | / | /  | 3  | CSIGTAPLDAIDI | 13     | 20   | 4-1   | 2  | QQYYSTPYS | 9      | 4    |
| CD21- SS03 20 | 4-59  | / | /  | 3  | CSIGTAPLDAIDI | 13     | 20   | 4-1   | 2  | QQYYSTPYS | 9      | 4    |
| CD21- SS03 21 | 4-59  | / | /  | 3  | CSIGTAPLDAIDI | 13     | 20   | 4-1   | 2  | QQYYSTPYS | 9      | 4    |
| CD21- SS03 22 | 4-59  | / | /  | 3  | CSIGTAPLDAIDI | 13     | 20   | 4-1   | 2  | QQYYSTPYS | 9      | 4    |
| CD21- SS03 23 | 4-59  | / | /  | 3  | CSIGTAPLDAIDI | 13     | 20   | 4-1   | 2  | QQYYSTPYS | 9      | 4    |
| CD21- SS03 24 | 4-59  | / | /  | 3  | CSIGTAPLDAIDI | 13     | 20   | 4-1   | 2  | QQYYSTPYS | 9      | 4    |

RF, reading frame; #, antibody failed to be expressed

-, non-reactive; +, reactive; +2, highly reactive

c, diffuse cytoplasmic staining; A, actin staining; G, Golgi staining; M, mitochondria staining; MS, mitotic spindle staining;

N, nuclear staining; F, cytoplasmic fibers

**Supplemental Table 2.** Repertoire of antibodies from CD21-/lo B cells of Sjögren's syndrome patient SS204

| Ig             | HEAVY |      |    |    |                      |        |      | LIGHT |    |           |        |      |
|----------------|-------|------|----|----|----------------------|--------|------|-------|----|-----------|--------|------|
|                | VH    | D    | RF | JH | CDR3 (aa)            | Length | Mut. | Vκ    | Jκ | CDR3 (aa) | Length | Mut. |
| CD21- SS204 01 | 1-69  | 4-17 | 2  | 4  | EGYGDG NRPFDY        | 12     | 9    |       |    |           |        |      |
| CD21- SS204 02 | 1-26  | 4-23 | 2  | 6  | EGLSDMGLRGVWFDYYGMDV | 20     | 2    |       |    |           |        |      |
| CD21- SS204 03 | 1-69  | 4-17 | 2  | 4  | EGYGDG NRPFDY        | 12     | 9    |       |    |           |        |      |
| CD21- SS204 04 | 1-69  | 4-17 | 2  | 4  | EGYGDG NRPFDY        | 12     | 9    |       |    |           |        |      |
| CD21- SS204 05 | 1-69  | 4-17 | 2  | 4  | EGYGDG NRPFDY        | 12     | 9    | 3-20  | 2  | QQYGSSPYT | 9      | 1    |
| CD21- SS204 06 | 1-69  | 4-17 | 2  | 4  | EGYGDG NRPFDY        | 12     | 9    | 3-20  | 2  | QQYGSSPYT | 9      | 1    |
| CD21- SS204 07 | 1-69  | 4-17 | 2  | 4  | EGYGDG NRPFDY        | 12     | 9    | 3-20  | 2  | QQYGSSPYT | 9      | 1    |
| CD21- SS204 08 | 1-69  | 4-17 | 2  | 4  | EGYGDG NRPFDY        | 12     | 9    | 3-20  | 2  | QQYGSSPYT | 9      | 2    |
| CD21- SS204 11 | 1-69  | 4-17 | 2  | 4  | EGYGDG NRPFDY        | 12     | 9    |       |    |           |        |      |
| CD21- SS204 12 | 1-69  | 4-17 | 2  | 4  | EGYGDG NRPFDY        | 12     | 9    |       |    |           |        |      |
| CD21- SS204 13 | 1-69  | 4-17 | 2  | 4  | EGYGDG NRPFDY        | 12     | 9    |       |    |           |        |      |
| CD21- SS204 14 | 1-69  | 4-17 | 2  | 4  | EGYGDG NRPFDY        | 12     | 9    |       |    |           |        |      |
| CD21- SS204 16 | 1-69  | 4-17 | 2  | 4  | EGYGDG NRPFDY        | 12     | 9    |       |    |           |        |      |
| CD21- SS204 17 | 1-69  | 4-17 | 2  | 4  | EGYGDG NRPFDY        | 12     | 9    |       |    |           |        |      |
| CD21- SS204 18 | 1-69  | 4-17 | 2  | 4  | EGYGDG NRPFDY        | 12     | 9    |       |    |           |        |      |
| CD21- SS204 20 | 1-69  | 4-17 | 2  | 4  | EGYGDG NRPFDY        | 12     | 10   | 3-20  | 2  | QQYGSSPYT | 9      | 5    |
| CD21- SS204 21 | 1-69  | 4-17 | 2  | 4  | EGYGDG NRPFDY        | 12     | 9    |       |    |           |        |      |
| CD21- SS204 22 | 1-69  | 4-17 | 2  | 4  | EGYGDG NRPFDY        | 12     | 9    |       |    |           |        |      |
| CD21- SS204 23 | 1-69  | 4-17 | 2  | 4  | EGYGDG NRPFDY        | 12     | 9    |       |    |           |        |      |
| CD21- SS204 25 | 1-69  | 4-17 | 2  | 4  | EGYGDG NRPFDY        | 12     | 9    |       |    |           |        |      |
| CD21- SS204 26 | 1-69  | 4-17 | 2  | 4  | EGYGDG NRPFDY        | 12     | 9    |       |    |           |        |      |
| CD21- SS204 27 | 1-69  | 4-17 | 2  | 4  | EGYGDG NRPFDY        | 12     | 9    |       |    |           |        |      |
| CD21- SS204 28 | 1-69  | 4-17 | 2  | 4  | EGYGDG NRPFDY        | 12     | 9    |       |    |           |        |      |
| CD21- SS204 30 | 1-69  | 4-17 | 2  | 4  | EGYGDG NRPFDY        | 12     | 9    |       |    |           |        |      |
| CD21- SS204 31 | 1-69  | 4-17 | 2  | 4  | EGYGDG NRPFDY        | 12     | 9    |       |    |           |        |      |
| CD21- SS204 32 | 1-69  | 4-17 | 2  | 4  | EGYGDG NRPFDY        | 12     | 9    |       |    |           |        |      |
| CD21- SS204 33 | 1-69  | 4-17 | 2  | 4  | EGYGDG NRPFDY        | 12     | 9    |       |    |           |        |      |
| CD21- SS204 34 | 1-69  | 4-17 | 2  | 4  | EGYGDG NRPFDY        | 12     | 9    |       |    |           |        |      |
| CD21- SS204 35 | 1-69  | 4-17 | 2  | 4  | EGYGDG NRPFDY        | 12     | 9    |       |    |           |        |      |
| CD21- SS204 36 | 1-69  | 4-17 | 2  | 4  | EGYGDG NRPFDY        | 12     | 9    |       |    |           |        |      |
| CD21- SS204 37 | 1-69  | 4-17 | 2  | 4  | EGYGDG NRPFDY        | 12     | 9    |       |    |           |        |      |
| CD21- SS204 38 | 1-69  | 4-17 | 2  | 4  | EGYGDG NRPFDY        | 12     | 9    |       |    |           |        |      |
| CD21- SS204 39 | 1-69  | 4-17 | 2  | 4  | EGYGDG NRPFDY        | 12     | 9    |       |    |           |        |      |
| CD21- SS204 40 | 1-69  | 4-17 | 2  | 4  | EGYGDG NRPFDY        | 12     | 9    |       |    |           |        |      |
| CD21- SS204 41 | 1-69  | 4-17 | 2  | 4  | EGYGDG NRPFDY        | 12     | 9    |       |    |           |        |      |
| CD21- SS204 42 | 1-69  | 4-17 | 2  | 4  | EGYGDG NRPFDY        | 12     | 9    |       |    |           |        |      |
| CD21- SS204 43 | 1-69  | 4-17 | 2  | 4  | EGYGDG NRPFDY        | 12     | 9    |       |    |           |        |      |
| CD21- SS204 44 | 1-69  | 4-17 | 2  | 4  | EGYGDG NRPFDY        | 12     | 9    |       |    |           |        |      |
| CD21- SS204 47 | 1-69  | 4-17 | 2  | 4  | EGYGDG NRPFDY        | 12     | 9    |       |    |           |        |      |
| CD21- SS204 48 | 1-69  | 4-17 | 2  | 4  | EGYGDG NRPFDY        | 12     | 9    |       |    |           |        |      |

RF, reading frame; #, antibody failed to be expressed

-, non-reactive; +, reactive; +2, highly reactive

c, diffuse cytoplasmic staining; A, actin staining; G, Golgi staining; M, mitochondria staining; MS, mitotic spindle staining;

N, nuclear staining; F, cytoplasmic fibers

**Supplemental Table 3.** Repertoire of antibodies from CD21-/lo B cells of Sjögren's syndrome patient SS59

| Ig             | HEAVY |      |    |    |                        |        |      | LIGHT |    |             |        |      |
|----------------|-------|------|----|----|------------------------|--------|------|-------|----|-------------|--------|------|
|                | VH    | D    | RF | JH | CDR3 (aa)              | Length | Mut. | Vκ    | Jκ | CDR3 (aa)   | Length | Mut. |
| CD21- SS59 01  | 3-53  | 3-3  | 2  | 6  | VRDFWSDYYRNPPRSFKYGMDV | 22     | 7    | 3-20  | 5  | QQYGSSPFSIT | 11     | 8    |
| CD21- SS59 07  | 4-39  | 3-22 | 2  | 5  | QQYYDSSGYYNWFDP        | 17     | 0    | 3-11  | 2  | QQRSNWYT    | 8      | 0    |
| CD21- SS59 09  | 3-53  | 3-3  | 2  | 6  | VRDFWSDYYRNPPRSFKYGMDV | 22     | 7    | 3-20  | 5  | QQYGSSPFSIT | 11     | 8    |
| CD21- SS59 10  | 3-53  | 3-3  | 2  | 6  | VRDFWSDYYRNPPRSFKYGMDV | 22     | 7    | 3-20  | 5  | QQYGSSPFSIT | 11     | 8    |
| CD21- SS59 12  | 3-53  | 3-3  | 2  | 6  | VRDFWSDYYRNPPRSFKYGMDV | 22     | 7    | 3-20  | 5  | QQYGSSPFSIT | 11     | 8    |
| CD21- SS59 14  | 3-53  | 3-3  | 2  | 6  | VRDFWSDYYRNPPRSFKYGMDV | 22     | 7    | 3-20  | 5  | QQYGSSPFSIT | 11     | 8    |
| CD21- SS59 15  | 3-53  | 3-3  | 2  | 6  | VRDFWSDYYRNPPRSFKYGMDV | 22     | 7    | 3-20  | 5  | QQYGSSPFSIT | 11     | 8    |
| CD21- SS59 16  | 3-53  | 3-3  | 2  | 6  | VRDFWSDYYRNPPRSFKYGMDV | 22     | 7    | 3-20  | 5  | QQYGSSPFSIT | 11     | 8    |
| CD21- SS59 19  | 3-53  | 3-3  | 2  | 6  | VRDFWSDYYRNPPRSFKYGMDV | 22     | 7    | 3-20  | 5  | QQYGSSPFSIT | 11     | 8    |
| CD21- SS59 20  | 3-53  | 5-12 | 1  | 4  | GWLRHKHFDY             | 10     | 15   | 3-15  | 1  | QQYNNWWT    | 8      | 0    |
| CD21- SS59 22  | 3-53  | 3-3  | 2  | 6  | VRDFWSDYYRNPPRSFKYGMDV | 22     | 7    | 3-20  | 5  | QQYGSSPFSIT | 11     | 8    |
| CD21- SS59 23  | 3-53  | 3-3  | 2  | 6  | VRDFWSDYYRNPPRSFKYGMDV | 22     | 7    | 3-20  | 5  | QQYGSSPFSIT | 11     | 8    |
| CD21- SS59 25  | 3-53  | 3-3  | 2  | 6  | VRDFWSDYYRNPPRSFKYGMDV | 22     | 7    | 3-20  | 5  | QQYGSSPFSIT | 11     | 8    |
| CD21- SS59 26  | 3-53  | 3-3  | 2  | 6  | VRDFWSDYYRNPPRSFKYGMDV | 22     | 7    | 3-20  | 5  | QQYGSSPFSIT | 11     | 8    |
| CD21- SS59 30  | 3-53  | 3-3  | 2  | 6  | VRDFWSDYYRNPPRSFKYGMDV | 22     | 8    | 3-20  | 5  | QQYGSSPFSIT | 11     | 8    |
| CD21- SS59 31  | 3-53  | 3-3  | 2  | 6  | VRDFWSDYYRNPPRSFKYGMDV | 22     | 6    | 3-20  | 5  | QQYGSSPFSIT | 11     | 8    |
| CD21- SS59 32  | 3-53  | 3-3  | 2  | 6  | VRDFWSDYYRNPPRSFKYGMDV | 22     | 7    | 3-20  | 5  | QQYGSSPFSIT | 11     | 8    |
| CD21- SS59 34  | 3-53  | 3-3  | 2  | 6  | VRDFWSDYYRNPPRSFKYGMDV | 22     | 7    | 3-20  | 5  | QQYGSSPFSIT | 11     | 8    |
| CD21- SS59 36  | 3-53  | 3-3  | 2  | 6  | VRDFWSDYYRNPPRSFKYGMDV | 22     | 7    | 3-20  | 5  | QQYGSSPFSIT | 11     | 8    |
| CD21- SS59 37  | 3-53  | 3-3  | 2  | 6  | VRDFWSDYYRNPPRSFKYGMDV | 22     | 7    | 3-20  | 5  | QQYGSSPFSIT | 11     | 8    |
| CD21- SS59 38  | 3-53  | 3-3  | 2  | 6  | VRDFWSDYYRNPPRSFKYGMDV | 22     | 7    | 3-20  | 5  | QQYGSSPFSIT | 11     | 8    |
| CD21- SS59 39  | 3-53  | 3-3  | 2  | 6  | VRDFWSDYYRNPPRSFKYGMDV | 22     | 7    | 3-20  | 5  | QQYGSSPFSIT | 11     | 8    |
| CD21- SS59 40  | 3-53  | 3-3  | 2  | 6  | VRDFWSDYYRNPPRSFKYGMDV | 22     | 7    | 3-20  | 5  | QQYGSSPFSIT | 11     | 8    |
| CD21- SS59 48  | 3-53  | 3-3  | 2  | 6  | VRDFWSDYYRNPPRSFKYGMDV | 22     | 7    | 3-20  | 5  | QQYGSSPFSIT | 11     | 8    |
| CD21- SS59 49  | 3-53  | 3-3  | 2  | 6  | VRDFWSDYYRNPPRSFKYGMDV | 22     | 7    | 3-20  | 5  | QQYGSSPFSIT | 11     | 8    |
| CD21- SS59 54  | 3-53  | 3-3  | 2  | 6  | VRDFWSDYYRNPPRSFKYGMDV | 22     | 7    | 3-20  | 5  | QQYGSSPFSIT | 11     | 8    |
| CD21- SS59 56  | 3-30  | 6-13 | 3  | 6  | DTLVIAAAGKGGYYGMDV     | 18     | 1    | 1-5   | 1  | QHSGA       | 5      | 0    |
| CD21- SS59 61  | 1-69  | 7-27 | 3  | 2  | DSGEGWYFDL             | 10     | 11   | 3-20  | 4  | QQYGNSPLT   | 9      | 3    |
| CD21- SS59 62  | 3-53  | 3-3  | 2  | 6  | VRDFWSDYYRNPPRSFKYGMDV | 22     | 7    | 3-20  | 5  | QQYGSSPFSIT | 11     | 8    |
| CD21- SS59 63  | 3-53  | 3-3  | 2  | 6  | VRDFWSDYYRNPPRSFKYGMDV | 22     | 7    | 3-20  | 5  | QQYGSSPFSIT | 11     | 8    |
| CD21- SS59 64  | 3-53  | 3-3  | 2  | 6  | VRDFWSDYYRNPPRSFKYGMDV | 22     | 7    | 3-20  | 5  | QQYGSSPFSIT | 11     | 8    |
| CD21- SS59 65  | 3-53  | 3-3  | 2  | 6  | VRDFWSDYYRNPPRSFKYGMDV | 22     | 7    | 3-20  | 5  | QQYGSSPFSIT | 11     | 8    |
| CD21- SS59 72  | 3-53  | 3-3  | 2  | 6  | VRDFWSDYYRNPPRSFKYGMDV | 22     | 7    | 3-20  | 5  | QQYGSSPFSIT | 11     | 8    |
| CD21- SS59 73  | 3-53  | 3-3  | 2  | 6  | VRDFWSDYYRNPPRSFKYGMDV | 22     | 7    | 3-20  | 5  | QQYGSSPFSIT | 11     | 8    |
| CD21- SS59 82  | 3-53  | 3-3  | 2  | 6  | VRDFWSDYYRNPPRSFKYGMDV | 22     | 7    | 3-20  | 5  | QQYGSSPFSIT | 11     | 8    |
| CD21- SS59 83  | 3-53  | 3-3  | 2  | 6  | VRDFWSDYYRNPPRSFKYGMDV | 22     | 7    | 3-20  | 5  | QQYGSSPFSIT | 11     | 8    |
| CD21- SS59 85  | 3-30  | 5-15 | 3  | 4  | ERDVVATNYYFDS          | 13     | 27   | 3-20  | 5  | QQYGSSPFSIT | 11     | 8    |
| CD21- SS59 86  | 3-53  | 3-3  | 2  | 6  | VRDFWSDYYRNPPRSFKYGMDV | 22     | 7    | 3-20  | 5  | QQYGSSPFSIT | 11     | 8    |
| CD21- SS59 89  | 3-53  | 3-3  | 2  | 6  | VRDFWSDYYRNPPRSFKYGMDV | 22     | 7    | 3-20  | 5  | QQYGSSPFSIT | 11     | 8    |
| CD21- SS59 92  | 3-53  | 3-3  | 2  | 6  | VRDFWSDYYRNPPRSFKYGMDV | 22     | 7    | 3-20  | 5  | QQYGSSPFSIT | 11     | 8    |
| CD21- SS59 93  | 3-53  | 3-3  | 2  | 6  | VRDFWSDYYRNPPRSFKYGMDV | 22     | 7    | 3-20  | 5  | QQYGSSPFSIT | 11     | 8    |
| CD21- SS59 95  | 3-53  | 3-3  | 2  | 6  | VRDFWSDYYRNPPRSFKYGMDV | 22     | 7    | 3-20  | 5  | QQYGSSPFSIT | 11     | 8    |
| CD21- SS59 150 | 3-53  | 3-3  | 2  | 6  | VRDFWSDYYRNPPRSFKYGMDV | 22     | 7    | 3-20  | 5  | QQYGSSPFSIT | 11     | 8    |
| CD21- SS59 172 | 3-53  | 3-3  | 2  | 6  | VRDFWSDYYRNPPRSFKYGMDV | 22     | 7    | 3-20  | 5  | QQYGSSPFSIT | 11     | 8    |
| CD21- SS59 174 | 3-53  | 3-3  | 2  | 6  | VRDFWSDYYRNPPRSFKYGMDV | 22     | 7    | 3-20  | 5  | QQYGSSPFSIT | 11     | 8    |
| CD21- SS59 179 | 3-53  | 3-3  | 2  | 6  | VRDFWSDYYRNPPRSFKYGMDV | 22     | 7    | 3-20  | 5  | QQYGSSPFSIT | 11     | 8    |
| CD21- SS59 185 | 3-53  | 3-3  | 2  | 6  | VRDFWSDYYRNPPRSFKYGMDV | 22     | 7    | 3-20  | 5  | QQYGSSPFSIT | 11     | 8    |
| CD21- SS59 186 | 3-53  | 3-3  | 2  | 6  | VRDFWSDYYRNPPRSFKYGMDV | 22     | 7    | 3-20  | 5  | QQYGSSPFSIT | 11     | 8    |
| CD21- SS59 188 | 3-53  | 3-3  | 2  | 6  | VRDFWSDYYRNPPRSFKYGMDV | 22     | 7    | 3-20  | 5  | QQYGSSPFSIT | 11     | 8    |
| CD21- SS59 190 | 3-53  | 3-3  | 2  | 6  | VRDFWSDYYRNPPRSFKYGMDV | 22     | 7    | 3-20  | 5  | QQYGSSPFSIT | 11     | 8    |
| CD21- SS59 45  | 4-34  | 3-16 | /  | 4  | GGVSNQSKYRNKLNKQRSFDY  | 23     | 1    |       |    |             |        |      |
| CD21- SS59 67  | 4-34  | 1-26 | 2  | 3  | GGGSYYYAFDI            | 10     | 0    |       |    |             |        |      |
|                | VH    | D    | RF | JH | CDR3 (aa)              | Length | Mut. | Vλ    | Jλ | CDR3 (aa)   | Length | Mut. |
| CD21- SS59 07  |       |      |    |    | see kappa              |        |      | 3-1   | 2  | QAWDSSTVV   | 9      | 0    |
| CD21- SS59 17  | 4-34  | 2-2  | 2  | 5  | GSCNSTSCRYNWFDP        | 15     | 7    | 1-44  | 1  | AAWDDSLNGYV | 13     | 2    |

RF, reading frame; #, antibody failed to be expressed

-, non-reactive; +, reactive; +2, highly reactive

c, diffuse cytoplasmic staining; A, actin staining; G, Golgi staining; M, mitochondria staining; MS, mitotic spindle staining;

N, nuclear staining; F, cytoplasmic fibers

**Supplemental Table 4.** Repertoire of antibodies from mature naive B cells of Sjögren's syndrome patient SS03

| Ig         | HEAVY |      |    |    |                             |        |      | LIGHT          |                |             |        |      |
|------------|-------|------|----|----|-----------------------------|--------|------|----------------|----------------|-------------|--------|------|
|            | VH    | D    | RF | JH | CDR3 (aa)                   | Length | Mut. | V <sub>k</sub> | J <sub>k</sub> | CDR3 (aa)   | Length | Mut. |
| mnSS03 03  | 1-8   | 3-10 | 3  | 4  | SMVRGVIPSNY                 | 11     | 0    | 4-1            | 2              | QQYYSTPYS   | 9      | 0    |
| mnSS03 04  | 3-21  | 3-22 | 2  | 6  | DLSYYDSSGYYYYYGMDV          | 19     | 1    | 1-39           | 1              | QQSYSTPPWT  | 10     | 0    |
| mnSS03 05  | 4-59  | /    | /  | 3  | CSIGTAPLDAIDI               | 13     | 20   | 4-1            | 2              | QQYYSTPYS   | 9      | 4    |
| mnSS03 06# | 3-7   | 4-17 | 2  | 5  | HGFDGDYVPGYDP               | 14     | 0    | 4-1            | 2              | QQYYSTPYS   | 9      | 4    |
| mnSS03 07  | 4-59  | /    | /  | 3  | CSIGTAPLDAIDI               | 13     | 20   | 4-1            | 2              | QQYYSTPYS   | 9      | 4    |
| mnSS03 08  | 4-34  | 6-13 | 1  | 5  | IRGRQLVRGAPS                | 12     | 0    | 3-20           | 1              | QQYGSSPQT   | 9      | 0    |
| mnSS03 09  | 4-59  | /    | /  | 3  | CSIGTAPLDAIDI               | 13     | 20   | 4-1            | 2              | QQYYSTPYS   | 9      | 4    |
| mnSS03 11  | 3-7   | 4-17 | 2  | 5  | HGFDGDYVPGYDP               | 14     | 1    | 2-30           | 2              | MQGTHWPLYS  | 10     | 0    |
| mnSS03 12  | 4-59  | /    | /  | 3  | CSIGTAPLDAIDI               | 13     | 20   | 4-1            | 2              | QQYYSTPYS   | 9      | 4    |
| mnSS03 13  | 4-59  | /    | /  | 3  | CSIGTAPLDAIDI               | 13     | 20   | 4-1            | 2              | QQYYSTPYS   | 9      | 4    |
| mnSS03 14  | 4-59  | /    | /  | 3  | CSIGTAPLDAIDI               | 13     | 20   | 4-1            | 2              | QQYYSTPYS   | 9      | 4    |
| mnSS03 15  | 4-59  | /    | /  | 3  | CSIGTAPLDAIDI               | 13     | 20   | 4-1            | 2              | QQYYSTPYS   | 9      | 4    |
| mnSS03 16  | 4-59  | /    | /  | 3  | CSJETAPLDAFDI               | 13     | 8    | 4-1            | 2              | QQYYSTPYS   | 9      | 2    |
| mnSS03 17  | 4-59  | /    | /  | 3  | CSIGTAPLDAIDI               | 13     | 20   | 4-1            | 2              | QQYYSTPYS   | 9      | 4    |
| mnSS03 18  | 4-59  | /    | /  | 3  | CSIGTAPLDAIDI               | 13     | 20   | 4-1            | 2              | QQYYSTPYS   | 9      | 4    |
| mnSS03 20  | 4-59  | /    | /  | 3  | CSIGTAPLDAIDI               | 13     | 20   | 4-1            | 2              | QQYYSTPYS   | 9      | 4    |
| mnSS03 21  | 4-59  | /    | /  | 3  | CSIGTAPLDAIDI               | 13     | 20   | 4-1            | 2              | QQYYSTPYS   | 9      | 4    |
| mnSS03 23  | 4-34  | 2-8  | 2  | 6  | YCTNPSRVVCCYYGMDV           | 17     | 0    | 1-16           | 1              | QQYNSYPRT   | 9      | 0    |
| mnSS03 24  | 4-59  | /    | /  | 3  | CSIGTAPLDAIDI               | 13     | 20   | 4-1            | 2              | QQYYSTPYS   | 9      | 4    |
| mnSS03 25  | 4-59  | /    | /  | 3  | CSIGTAPLDAIDI               | 13     | 20   | 4-1            | 2              | QQYYSTPYS   | 9      | 4    |
| mnSS03 26  | 4-59  | /    | /  | 3  | CSIGTAPLDAIDI               | 13     | 20   | 4-1            | 2              | QQYYSTPYS   | 9      | 4    |
| mnSS03 27  | 4-59  | /    | /  | 3  | CSIGTAPLDAIDI               | 13     | 20   | 4-1            | 2              | QQYYSTPYS   | 9      | 4    |
| mnSS03 28  | 4-59  | /    | /  | 3  | CSIGTAPLDAIDI               | 13     | 20   | 4-1            | 2              | QQYYSTPYS   | 9      | 4    |
| mnSS03 29# | 3-21  | 2-2  | 3  | 5  | GIGDIVVPAIAGANWFDP          | 19     | 0    | 3-11           | 5              | QQRSNWPPIT  | 10     | 0    |
| mnSS03 30  | 3-30  | 2-15 | 3  | 6  | DILRLVVVATHGYYYYGMDV        | 21     | 3    | 3-20           | 2              | QQYGSSPYS   | 9      | 1    |
| mnSS03 31  | 4-59  | /    | /  | 3  | CSIGTAPLDAIDI               | 13     | 20   | 4-1            | 2              | QQYYSTPYS   | 9      | 4    |
| mnSS03 34  | 4-59  | /    | /  | 3  | CSIGTAPLDAIDI               | 13     | 20   | 4-1            | 2              | QQYYSTPYS   | 9      | 4    |
| mnSS03 35  | 3-48  | 2-2  | 2  | 6  | FLGYCSSTSCYTGRPDRGGYYYYGMDV | 28     | 0    | 3-15           | 2              | QQYNNWPPYS  | 10     | 0    |
| mnSS03 36  | 4-59  | /    | /  | 3  | CSIGTAPLDAIDI               | 13     | 20   | 4-1            | 2              | QQYYSTPYS   | 9      | 4    |
| mnSS03 38  | 4-59  | /    | /  | 3  | CSIGTAPLDAIDI               | 13     | 20   | 4-1            | 2              | QQYYSTPYS   | 9      | 4    |
| mnSS03 39# | 4-39  | 2-15 | 2  | 6  | YCSGGSCYSVHGMDV             | 15     | 0    | 3-11           | 5              | QQRSNWPPIT  | 10     | 0    |
| mnSS03 41  | 4-59  | /    | /  | 3  | CSIGTAPLDAIDI               | 13     | 20   | 4-1            | 2              | QQYYSTPYS   | 9      | 4    |
| mnSS03 42  | 3-30  | 5-5  | 1  | 1  | DAGIQLLAIEYFQH              | 13     | 0    | 3-11           | 3              | QQRSNWPLT   | 9      | 0    |
| mnSS03 43  | 1-2   | 5-5  | 2  | 4  | GRGYSYGPVDY                 | 11     | 0    | 3-20           | 4              | QQYGSSPPLT  | 10     | 0    |
| mnSS03 44  | 4-39  | 3-22 | 2  | 3  | QGKAGGYDSSGYFFKDAFDI        | 22     | 0    | 1-5            | 2              | QQYNSYSYS   | 9      | 1    |
| mnSS03 45  | 4-59  | /    | /  | 3  | CSIGTAPLDAIDI               | 13     | 21   | 4-1            | 2              | QQYYSTPYS   | 9      | 4    |
| mnSS03 46  | 4-59  | /    | /  | 3  | CSIGTAPLDAIDI               | 13     | 20   | 4-1            | 2              | QQYYSTPYS   | 9      | 4    |
| mnSS03 48  | 4-59  | /    | /  | 3  | CSIGTAPLDAIDI               | 13     | 20   | 4-1            | 2              | QQYYSTPYS   | 9      | 4    |
| mnSS03 22  | 3-30  | 3-3  | 2  | 4  | DGGDFWWSGFLFEY              | 14     | 8    |                |                |             |        |      |
| mnSS03 33  | 4-34  | 3-22 | 2  | 4  | DDSSGYPPDY                  | 10     | 1    |                |                |             |        |      |
| mnSS03 47  | 4-39  | 3-9  | 2  | 4  | PILTYGYYFDY                 | 12     | 0    |                |                |             |        |      |
|            | VH    | D    | RF | JH | CDR3 (aa)                   | Length | Mut. | V <sub>λ</sub> | J <sub>λ</sub> | CDR3 (aa)   | Length | Mut. |
| mnSS03 10  | 3-23  | 2-2  | 2  | 5  | SIRSTSS                     | 7      | 2    | 2-14           | 2              | SSYTSSSFVV  | 10     | 0    |
| mnSS03 32  | 3-15  | 5-12 | 1  | 6  | DRGKGWLRLLGYGMDV            | 16     | 1    | 1-44           | 3              | AAWDDSLNGPV | 11     | 0    |
| mnSS03 42  |       |      |    |    | see kappa                   |        |      | 2-14           | 3              | SSYTGSSRV   | 9      | 3    |

RF, reading frame; #, antibody failed to be expressed

-, non-reactive; +, reactive; +2, highly reactive

c, diffuse cytoplasmic staining; A, actin staining; G, Golgi staining; M, mitochondria staining; MS, mitotic spindle staining; N, nuclear staining; F, cytoplasmic fibers

**Supplemental Table 5.** Repertoire of antibodies from mature naive B cells of Sjögren's syndrome patient SS204

| Ig         | HEAVY |      |    |    |                  |        |      | LIGHT |    |           |        |      |
|------------|-------|------|----|----|------------------|--------|------|-------|----|-----------|--------|------|
|            | VH    | D    | RF | JH | CDR3 (aa)        | Length | Mut. | Vk    | Jk | CDR3 (aa) | Length | Mut. |
| mnSS204 50 | 1-69  | 4-17 | 2  | 4  | EGYGDGNRPFDY     | 12     | 13   | 3-20  | 2  | QQYGSSPYT | 9      | 1    |
| mnSS204 51 | 1-69  | 4-17 | 2  | 4  | EGYGDGNRPFDY     | 12     | 9    |       |    |           |        |      |
| mnSS204 54 | 1-69  | 4-17 | 2  | 4  | EGYGDGNRPFDY     | 12     | 9    |       |    |           |        |      |
| mnSS204 55 | 1-69  | 4-17 | 2  | 4  | EGYGDGNRPFDY     | 12     | 9    |       |    |           |        |      |
| mnSS204 56 | 1-69  | 4-17 | 2  | 4  | EGYGDGNRPFDY     | 12     | 11   |       |    |           |        |      |
| mnSS204 57 | 1-69  | 4-17 | 2  | 4  | EGYGDGNRPFDY     | 12     | 9    |       |    |           |        |      |
| mnSS204 58 | 1-69  | 4-17 | 2  | 4  | EGYGDGNRPFDY     | 12     | 9    |       |    |           |        |      |
| mnSS204 59 | 3-11  | 2-2  | 2  | 5  | DALYCSSTSCYSGFDP | 16     | 0    |       |    |           |        |      |
| mnSS204 60 | 1-69  | 4-17 | 2  | 4  | EGYGDGNRPFDY     | 12     | 9    |       |    |           |        |      |
| mnSS204 62 | 3-23  | /    | /  | 4  | DRGRSPYYFDY      | 11     | 3    |       |    |           |        |      |
| mnSS204 63 | 1-8   | /    | /  | 5  | GSQALDT          | 7      | 20   |       |    |           |        |      |
| mnSS204 67 | 3-48  | 5-5  |    | 4  | LPLRYSYSPGGDY    | 13     | 0    |       |    |           |        |      |
| mnSS204 68 | 3-30  | 6-6  | 2  | 4  | EYSSSSGGETRDY    | 13     | 1    |       |    |           |        |      |
| mnSS204 69 | 4-59  | 6-6  | 3  | 4  | ARHSIAARVFDY     | 12     | 0    |       |    |           |        |      |
| mnSS204 80 | 1-69  | 4-17 | 2  | 4  | EGYGDGNRPFDY     | 12     | 9    |       |    |           |        |      |
| mnSS204 85 | 3-11  | /    | /  | 4  | GQAKDY           | 6      | 5    |       |    |           |        |      |
| mnSS204 86 | 3-49  | 6-13 |    | 4  | SSWYGGDYFDY      | 11     | 0    |       |    |           |        |      |
| mnSS204 89 | 1-69  | 4-17 | 2  | 4  | EGYGDGNRPFDY     | 12     | 9    |       |    |           |        |      |
| mnSS204 90 | 3-53  | 4-4  |    | 4  | VIIGLQYIDY       | 10     | 0    |       |    |           |        |      |
| mnSS204 91 | 1-69  | 4-17 | 2  | 4  | EGYGDGNRPFDY     | 12     | 9    |       |    |           |        |      |
| mnSS204 93 | 1-69  | 4-17 | 2  | 4  | EGYGDGNRPFDY     | 12     | 9    |       |    |           |        |      |
| mnSS204 94 | 3-73  | /    | /  | 6  | QQGERVGTYYYYYMDA | 17     | 11   |       |    |           |        |      |

RF, reading frame; #, antibody failed to be expressed

-, non-reactive; +, reactive; +2, highly reactive

c, diffuse cytoplasmic staining; A, actin staining; G, Golgi staining; M, mitochondria staining; MS, mitotic spindle staining;

N, nuclear staining; F, cytoplasmic fibers

**Supplemental Table 6.** Repertoire of antibodies from new emigrant B cells of Sjögren's syndrome patient SS03

| Ig        | HEAVY  |      |    |    |                         |        | LIGHT |    |             |        |
|-----------|--------|------|----|----|-------------------------|--------|-------|----|-------------|--------|
|           | VH     | D    | RF | JH | CDR3 (aa)               | Length | Vκ    | Jκ | CDR3 (aa)   | Length |
| neSS03 04 | 3-74   | /    | /  | 6  | DLVPQDYGGMDV            | 13     | 1-8   | 4  | QQYYSYPLT   | 8      |
| neSS03 05 | 3-21   | 3-3  | 3  | 4  | DWPIFGVAAGFDY           | 13     | 3-15  | 1  | QQYNNWPKT   | 9      |
| neSS03 10 | 4-34   | 1-1  | 2  | 4  | GWDYNWND                | 8      | 4-1   | 4  | QQYYSTPLT   | 9      |
| neSS03 11 | 4-59   | 3-16 | 2  | 4  | TINYVWGSYRH             | 11     | 1-5   | 2  | QQYNSYSDT   | 9      |
| neSS03 18 | 3-48   | 5-5  | 2  | 6  | DGVYSYGYDGPYYYYGMDV     | 19     | 4-1   | 2  | QQYYSTPYT   | 9      |
| neSS03 19 | 3-23   | 4-17 | 3  | 6  | ATTVTAPEYYYYGMDV        | 16     | 3-15  | 4  | QQYNNWPPLT  | 10     |
| neSS03 24 | 4-39   | 6-13 | 3  | 6  | RGIAAAGNGNYGMDV         | 15     | 1-5   | 4  | QQYNSYLLT   | 9      |
| neSS03 26 | 3-33   | 3-22 | 2  | 4  | ELTYYYDSSGQTPPGY        | 16     | 1-5   | 1  | QQYNSYFWT   | 9      |
| neSS03 28 | 3-23   | 5-24 | 2  | 4  | GRTKNGYTWELLYYFDY       | 17     | 1-33  | 3  | QQYDNLPPIT  | 10     |
| neSS03 29 | 4-59   | 5-5  | 2  | 2  | GGRFGYSYGSNWYFDL        | 16     | 3-15  | 2  | QQYNNWPYS   | 9      |
| neSS03 31 | 3-30-3 | 6-13 | 3  | 4  | AAGSFFDY                | 8      | 3-15  | 1  | QQYNNWWT    | 8      |
| neSS03 38 | 4-34   | /    | /  | 6  | LPYYYYYGMV              | 11     | 1-16  | 4  | QQYNSYPLT   | 9      |
| neSS03 45 | 3-48   | 2-2  | 3  | 6  | DRSATNRNVPAAMLYYYYYGMDV | 23     | 2-28  | 1  | MQALQTPRT   | 9      |
|           | VH     | D    | RF | JH | CDR3 (aa)               | Length | Vλ    | Jλ | CDR3 (aa)   | Length |
| neSS03 01 | 4-31   | 3-10 | 1  | 3  | SALWFGELLGTFDI          | 14     | 2-14  | 2  | SSYTSSSTL   | 9      |
| neSS03 02 | 3-33   | 4-17 | 2  | 3  | DHYDYFGAFDI             | 11     | 2-11  | 2  | CSYAGSYTRV  | 10     |
| neSS03 03 | 4-34   | 3-10 | 3  | 5  | GRGTMVRGGNWFDP          | 14     | 3-1   | 2  | QAWDSSTGVV  | 10     |
| neSS03 04 |        |      |    |    | see kappa               |        | 2-14  | 2  | SSYTSSSTLVV | 11     |
| neSS03 06 | 3-9    | 6-13 | 2  | 4  | AYSSTTADPSDY            | 12     | 2-14  | 2  | SSYTSSSTV   | 9      |
| neSS03 08 | 1-8    | 3-22 | 2  | 5  | GSDSYDSSGYYYIYNWFDP     | 20     | 1-40  | 1  | QSYDSSLSGV  | 10     |
| neSS03 09 | 3-23   | 5-24 | 1  | 4  | DDRRWLQSYFDY            | 12     | 2-8   | 2  | SSYAGSNNLV  | 10     |
| neSS03 12 | 3-9    | 5-12 | 2  | 6  | DRGGYDNYGGMDV           | 15     | 2-23  | 2  | CSYAGSSVVV  | 10     |
| neSS03 13 | 3-21   | 1-26 | 3  | 4  | DQGVGALDY               | 9      | 2-11  | 2  | CSYAGSKE    | 8      |
| neSS03 17 | 3-48   | /    | /  | 6  | SLYTYGTYGGMDV           | 15     | 3-1   | 2  | QAWDSSTVV   | 9      |
| neSS03 21 | 3-15   | 3-22 | 2  | 4  | DTNYYDSSGYYDFDY         | 15     | 3-1   | 2  | QAWDSSTARV  | 10     |
| neSS03 26 |        |      |    |    | see kappa               |        | 2-14  | 3  | SSYTSSSRV   | 9      |
| neSS03 30 | 4-34   | 6-19 | 2  | 4  | TEPYSSGWYLRVGGYYFDY     | 19     | 2-11  | 3  | CSYAGSYTWV  | 10     |
| neSS03 36 | 4-59   | 3-10 | 3  | 6  | TGMVRGVHIDSYYYGMDV      | 18     | 3-1   | 3  | QAWDSSTAV   | 9      |

RF, reading frame; #, antibody failed to be expressed, ND, not done

-, non-reactive; +, reactive; +2, highly reactive

c, diffuse cytoplasmic staining; A, actin staining; G, Golgi staining; M, mitochondria staining; MS, mitotic spindle staining; N, nuclear staining; F, cytoplasmic fibers

**Supplemental Table 7.** Repertoire of antibodies from mature naive B cells of Sjögren's syndrome patient SS59

| Ig        | HEAVY |      |    |    |                                 |        |      | LIGHT |    |              |        |      |
|-----------|-------|------|----|----|---------------------------------|--------|------|-------|----|--------------|--------|------|
|           | VH    | D    | RF | JH | CDR3 (aa)                       | Length | Mut. | Vκ    | Jκ | CDR3 (aa)    | Length | Mut. |
| mnSS59 18 | 3-21  | 2-21 | 3  | 4  | VEGLGVVALLY                     | 11     | 0    | 1-9   | 1  | QQLNSYPPWT   | 10     | 2    |
| mnSS59 17 | 3-11  | 6-19 | 2  | 4  | DTGYSTTVDY                      | 10     | 0    |       |    |              |        |      |
| mnSS59 19 | 1-8   | 5-12 | 1  | 6  | GLWLREPDVPEYYYYYGGMDV           | 21     | 0    |       |    |              |        |      |
| mnSS59 24 | 3-20  | /    | /  | 6  | WALSGYYYYYGGMDV                 | 14     | 0    |       |    |              |        |      |
| mnSS59 34 | 1-69  | 3-10 | 3  | 4  | DRVVRGVPQRYFFDY                 | 16     | 0    |       |    |              |        |      |
| mnSS59 35 | 3-21  | 3-10 | 1  | 6  | DGDLLWFGELLPKEGGYGGMDV          | 22     | 0    |       |    |              |        |      |
| mnSS59 37 | 3-13  | 7-27 | 3  | 4  | GSLKTGDIDY                      | 10     | 0    |       |    |              |        |      |
| mnSS59 39 | 4-59  | 2-2  | 2  | 6  | ADSYCSSTSCKRRGYSENRNQYYYYYGGMDV | 32     | 0    |       |    |              |        |      |
|           | VH    | D    | RF | JH | CDR3 (aa)                       | Length | Mut. |       |    |              |        |      |
| mnSS59 02 | 3-23  | 1-26 | 3  | 4  | ASRRIVGATSIFDY                  | 14     | 0    | 1-47  | 1  | AAWDDSLSGYV  | 11     | 0    |
| mnSS59 09 | 3-48  | 3-3  | 2  | 4  | DLGDYDFWSGYGAAAGNFDY            | 21     | 0    | 3-21  | 2  | QVWDSSSDHPV  | 11     | 0    |
| mnSS59 13 | 3-21  | 3-9  | 1  | 4  | DTESNPVLRVFDWLPYYFDY            | 21     | 0    | 3-21  | 2  | QVWDSSSDHPV  | 11     | 0    |
| mnSS59 16 | 3-23  | 3-10 | 2  | 6  | DWESGYYGSGSYLLNYYYYGGMDV        | 23     | 0    | 1-44  | 2  | AAWDDSLNGPV  | 11     | 0    |
| mnSS59 18 |       |      |    |    | see kappa                       |        |      | 2-14  | 3  | SSYTSSSTWV   | 10     | 3    |
| mnSS59 22 | 3-33  | /    | /  | 6  | DGVYYYYGGMDV                    | 11     | 0    | 2-14  | 2  | SSYTSSSSV    | 10     | 1    |
| mnSS59 28 | 5-51  | /    | /  | 4  | HSSLVDSPDY                      | 10     | 0    | 2-14  | 2  | SSYTSSSTRV   | 10     | 2    |
| mnSS59 44 | 1-2   | 6-19 | 3  | 4  | EGLVAGTQEYYFDY                  | 14     | 0    | 1-44  | 1  | AAWDDSLNGHYV | 12     | 0    |

RF, reading frame; #, antibody failed to be expressed

-, non-reactive; +, reactive; +2, highly reactive

c, diffuse cytoplasmic staining; A, actin staining; G, Golgi staining; M, mitochondria staining; MS, mitotic spindle staining;

N, nuclear staining; F, cytoplasmic fibers
